# Supplementary material
Source: PubMed Central journal article supplement (PMC3630855)
Supplement: supp_M112.442996_jbc.M112.442996-1.pdf [file supp_M112.442996_jbc.M112.442996-1.pdf]

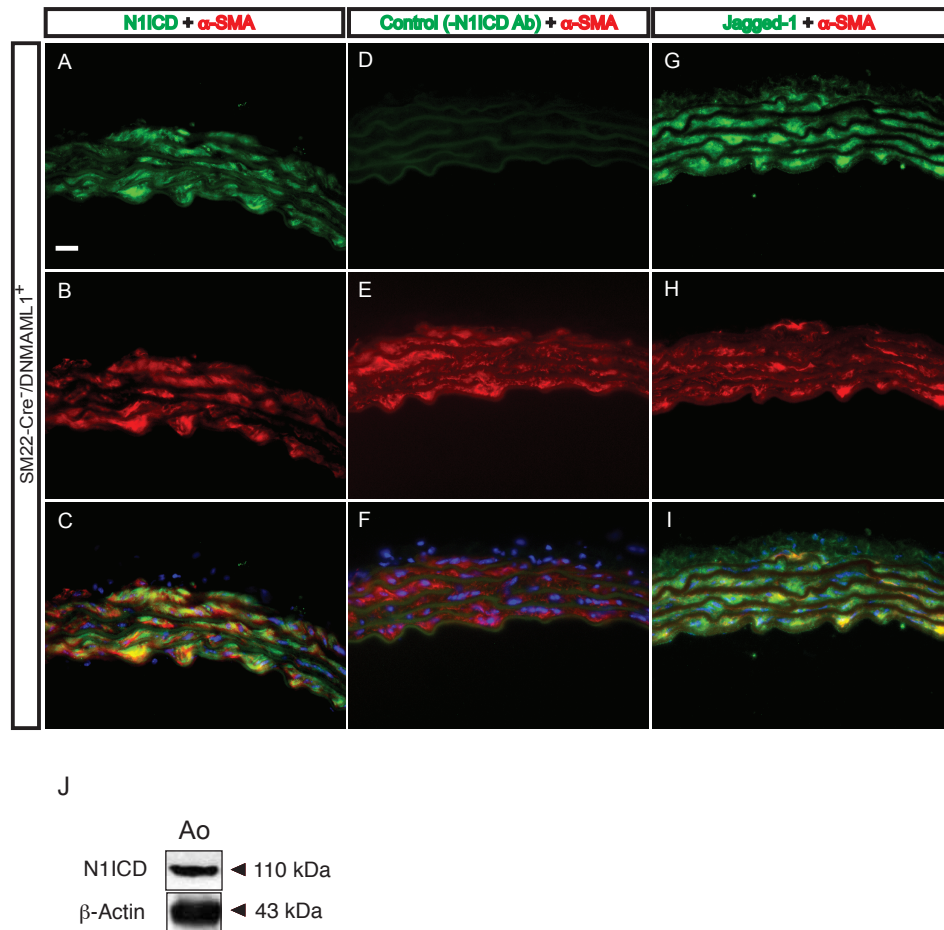

**Notch1 receptor and Jagged-1 ligand expression in control (SM22-Cre<sup>-</sup>/DNMAML1<sup>+</sup>) thoracic aorta.** *A-I*, immunohistochemistry, aortic cross-section. *A-C*, Detection of cleaved Notch1 intracellular domain (N1ICD), *A*;  $\alpha$ -SMA stain, *B*; and merge in panel *C*. *D-F*, Control stain in absence of primary anti-N1ICD Ab, *D*;  $\alpha$ -SMA stain, *E*; and merge in panel *F*. *G-I*, Jagged-1 expression, *G*;  $\alpha$ -SMA stain, *H*; and merge in panel *I*. Nuclei are counterstained with DAPI (blue). *J*, Western blot detection of cleaved Notch1 (N1ICD) and  $\beta$ -actin (reference protein) from whole aorta (Ao).

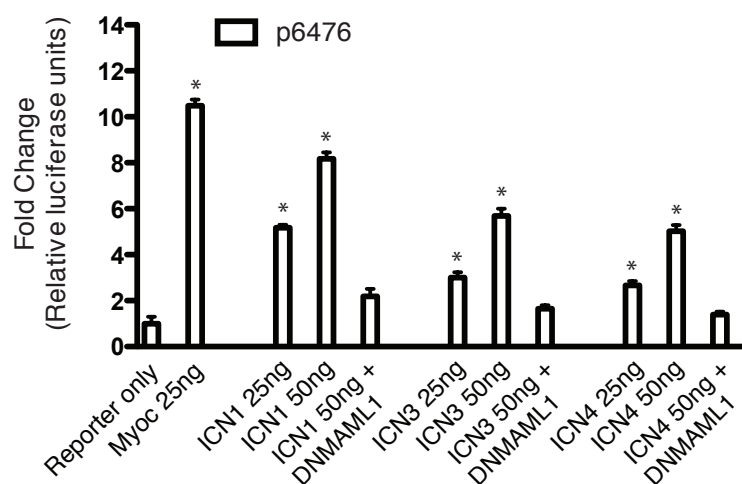

**MLCK promoter is transduced by multiple Notch receptors in transfected 10T1/2 cells.** Dose-dependent transactivation of p6476 luciferase reporter by ICN1 (intracellular Notch1), ICN3 (intracellular Notch3), or ICN4 (intracellular Notch4) expression. Inclusion of DNMAML1 (+DNMAML1, 50ng) abrogates inductive responses. Data represent mean $\pm$ SEM, n=3; \* $P$ <0.02 vs reporter only.
